# Supplementary material for: Immunogenicity and efficacy of VLA2001 vaccine against SARS-CoV-2 infection in male cynomolgus macaques
Source: PubMed Central journal article supplement (PMC10991505; doi:10.1038/s43856-024-00488-w), 2024-04-03

**1 Supplementary Table 1. Characteristics of the animals included into the study.**

| ID   | Experimental group | Sexe | Age at 1st immunization (months) | Weight at 1st immunization (kg) | Necropsy (days post exposure) | Symbol and color for figures |
|------|--------------------|------|----------------------------------|---------------------------------|-------------------------------|------------------------------|
| MF1  | Ctrl               | male | 46.3                             | 5.11                            | 15                            | ●                            |
| MF2  | Ctrl               | male | 45.0                             | 3.82                            | 7                             | ■                            |
| MF3  | Ctrl               | male | 44.6                             | 4.74                            | 15                            | ▲                            |
| MF4  | Ctrl               | male | 44.7                             | 3.67                            | 7                             | ▼                            |
| MF5  | Ctrl               | male | 44.3                             | 4.48                            | 15                            | ◆                            |
| MF6  | Ctrl               | male | 45.5                             | 4.32                            | 15                            | ⬢                            |
| MF7  | Ctrl               | male | 44.5                             | 5.50                            | 7                             | ×                            |
| MF8  | Ctrl               | male | 43.8                             | 3.89                            | 7                             | +                            |
| MF9  | High               | male | 46.2                             | 4.46                            | 15                            | ●                            |
| MF10 | High               | male | 45.8                             | 4.58                            | 7                             | ■                            |
| MF11 | High               | male | 46.1                             | 5.00                            | 7                             | ▲                            |
| MF12 | High               | male | 45.0                             | 6.35                            | 15                            | ▼                            |
| MF13 | High               | male | 45.1                             | 4.25                            | 7                             | ◆                            |
| MF14 | High               | male | 44.3                             | 4.00                            | 15                            | ⬢                            |
| MF15 | High               | male | 44.7                             | 3.07                            | 15                            | ×                            |
| MF16 | High               | male | 44.2                             | 4.00                            | 7                             | +                            |
| MF17 | Medium             | male | 46.2                             | 6.00                            | 15                            | ●                            |
| MF18 | Medium             | male | 46.2                             | 5.60                            | 15                            | ■                            |
| MF19 | Medium             | male | 45.7                             | 5.85                            | 7                             | ▲                            |
| MF20 | Medium             | male | 44.8                             | 3.28                            | 15                            | ▼                            |
| MF21 | Medium             | male | 44.7                             | 4.79                            | 15                            | ◆                            |
| MF22 | Medium             | male | 45.1                             | 4.82                            | 7                             | ⬢                            |
| MF23 | Medium             | male | 44.5                             | 4.23                            | 7                             | ×                            |
| MF24 | Medium             | male | 43.7                             | 4.60                            | 7                             | +                            |

- 2 **Supplementary Table 2. Histopathological score.** Histopathology scoring system used for SARS-CoV-2
- 3 induced pulmonary lesions.

| <b>Parameters</b>               | <b>Score</b> | <b>Description</b>                 |
|---------------------------------|--------------|------------------------------------|
| Septal cellularity              | 0            | Normal alveolar wall (AW)          |
|                                 | 1            | 1-2 red blood cell (RBC), thick AW |
|                                 | 2            | 2-4 RBC, thick AW                  |
|                                 | 3            | 5-10 RBC, thick AW                 |
|                                 | 4            | >10, thick AW                      |
| Septal fibrosis                 | 0            | Absent                             |
|                                 | 1            | Present                            |
| Type II pneumocytes hyperplasia | 0            | Absent                             |
|                                 | 1            | Present                            |
| Alveolar macrophages            | 0            | Absent                             |
|                                 | 1            | 1-5 per x20 field of view (FOV)    |
|                                 | 2            | 6-10 per x20 FOV                   |
|                                 | 3            | 11-15 per x20 FOV                  |
|                                 | 4            | >15 per x20 FOV                    |
| Alveolar neutrophils            | 0            | Absent                             |
|                                 | 1            | 1-5 per x20 FOV                    |
|                                 | 2            | 6-10 per x20 FOV                   |
|                                 | 3            | 11-15 per x20 FOV                  |
|                                 | 4            | >15 per x20 FOV                    |

4 **Supplementary Figure 1. Antibody responses in cynomolgus macaques.** Individual titers (AU/mL) of  
5 IgG binding to SARS-CoV-2 S (upper), RBD (center) and N (lower) proteins measured in sera samples.  
6 BL: baseline approximately 3 weeks before first immunization. Black dotted vertical lines represent  
7 vaccinations (weeks 0 and 3). Red dotted vertical lines represent SARS-CoV-2 exposure (week 7).  
8 Each animal is identified by distinct symbols (Supplementary Table 1 for matching symbols). Control  
9 group is in black, High dose group is in blue and Medium dose group is in orange.

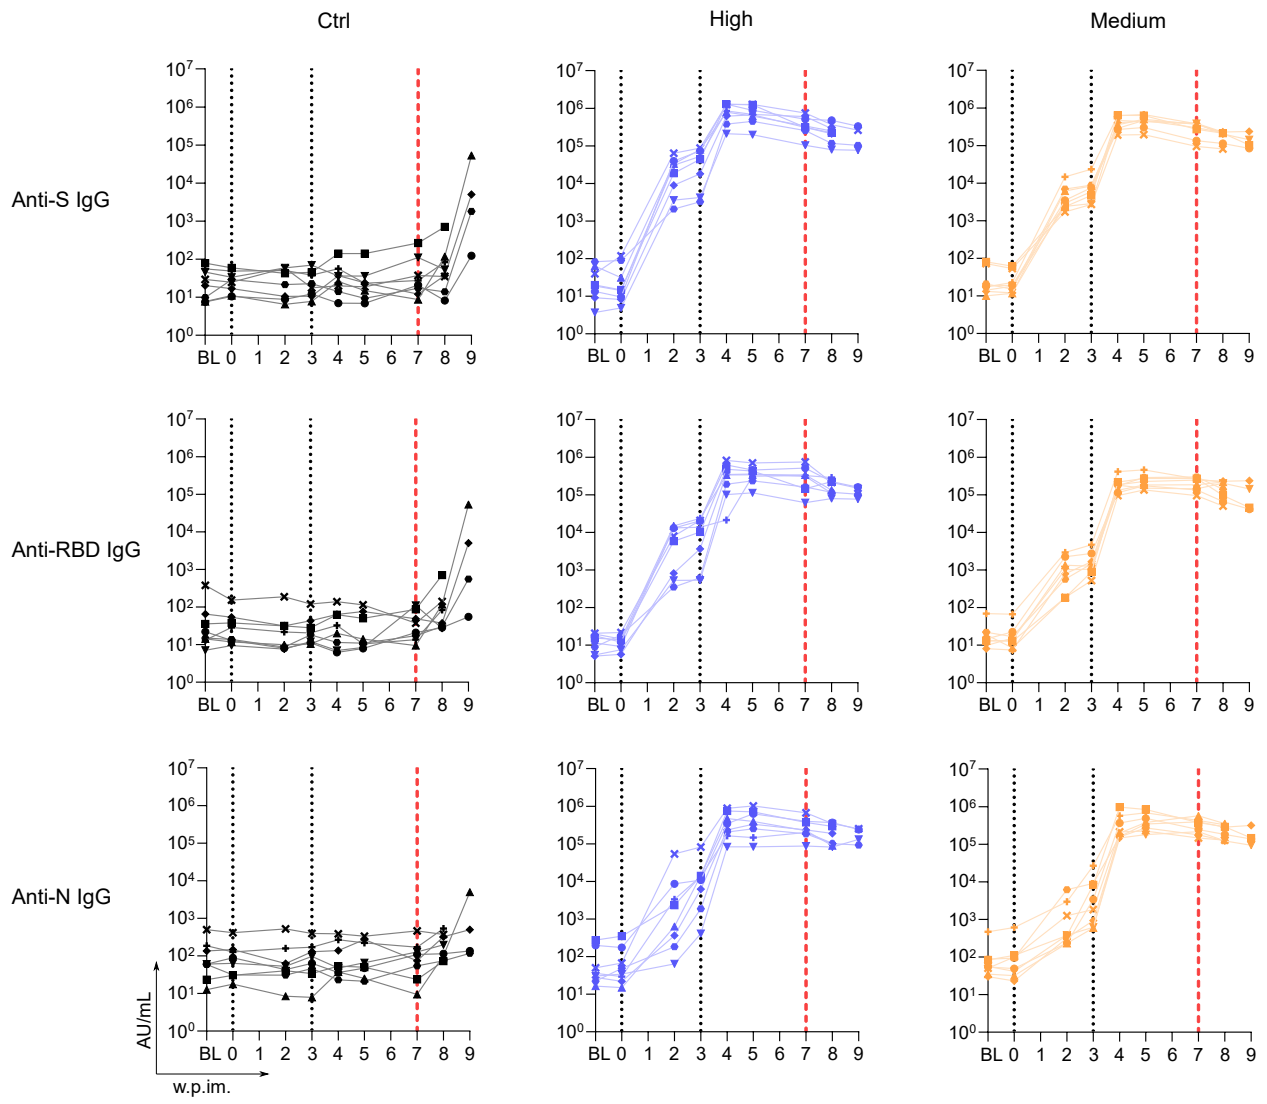

10 **Supplementary Figure 2. Neutralizing antibody responses in cynomolgus macaques.** Individual titers  
11 of neutralizing antibody to SARS-CoV-2 (NT<sub>50</sub>: 50 % neutralizing titer) in sera samples. BL: baseline  
12 approximately 3 weeks before first immunization. Black vertical dotted lines represent vaccinations  
13 (weeks 0 and 3). Red vertical dotted lines represent SARS-CoV-2 exposure (week 7). Graph starts at the  
14 limit of quantification at 5. Dotted horizontal line indicates the titer of the WHO International Standard  
15 for anti-SARS-CoV-2 immunoglobulin in human determined in the same assay.

16 Each animal is identified by distinct symbols (Supplementary Table 1 for matching symbols). Control  
17 group is in black, High dose group is in blue and Medium dose group is in orange.

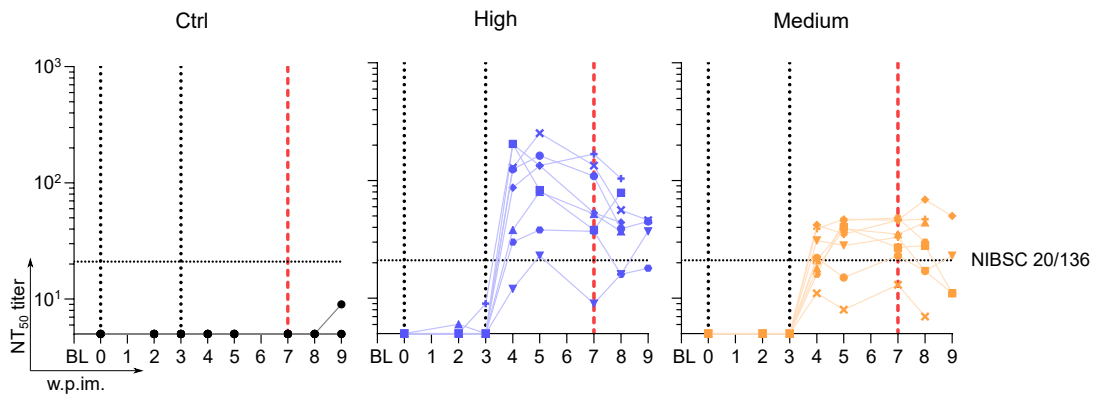



18 **Supplementary Figure 3. Subgenomic viral quantification (sgRNA) in fluids from respiratory tract**  
19 **following SARS-CoV-2 exposure. a,** Peak of subgenomic viral RNA (sgRNA) quantification in  
20 nasopharyngeal and tracheal fluids collected with swabs (Box and whiskers, min to max) (non-  
21 parametric Kruskal-Wallis and Dunn's multiple comparisons tests; n=8 per group). Dotted horizontal  
22 line represents the lower limit of quantification (LLOQ) at  $3.87 \log_{10}$  copies/mL. Graphs start at the  
23 lower limit of detection (LLOD) at  $2.87 \log_{10}$  copies/mL. Values below the LLOD were plotted at  
24  $2.87 \log_{10}$  copies/mL. **b,** Individual sgRNA quantification in fluids from bronchoalveolar lavages (BAL)  
25 performed at day 3 post SARS-CoV-2 exposure (Box and whiskers, min to max) (non-parametric  
26 Kruskal-Wallis and Dunn's multiple comparisons tests; n=8 per group). Dotted horizontal line  
27 represents the LLOQ at  $3.87 \log_{10}$  copies/mL. Graph starts at the LLOD at  $2.87 \log_{10}$  copies/mL. Values  
28 below the LLOD were plotted at  $2.87 \log_{10}$  copies/mL.

29 Each animal is identified by distinct symbols (Supplementary Table 1 for matching symbols). Control  
30 group is in black, High dose group is in blue and Medium dose group is in orange.

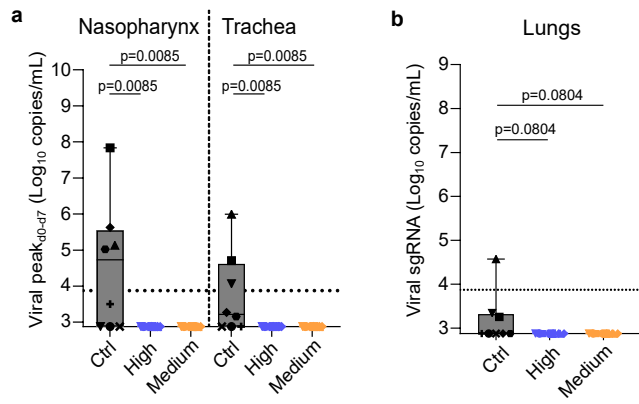

31 **Supplementary Figure 4. Illustrative images of CT acquisition following SARS-CoV-2 exposure.**  
32 Representative transversal slices of chest CT scans performed at baseline (BL, week 5 post first  
33 immunization), day 3 and day 10 post SARS-CoV-2 exposure showing typical lung lesions.  
34 Control group is in black, High dose group is in blue and Medium dose group is in orange.

Ctrl

MF1

MF2

MF3

MF4

MF5

MF6

MF7

MF8

BL

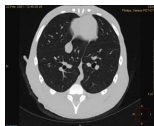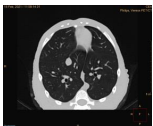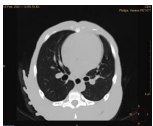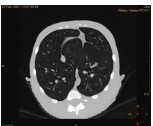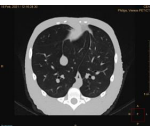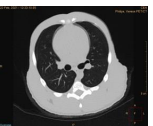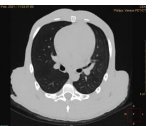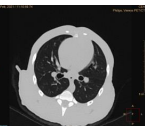

d3

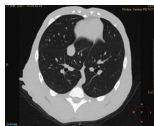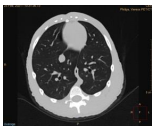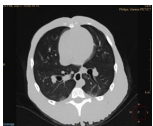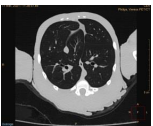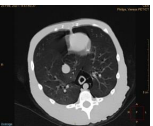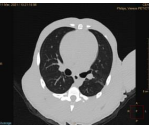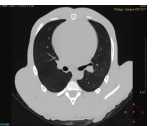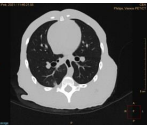

d10

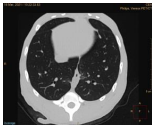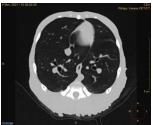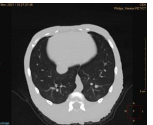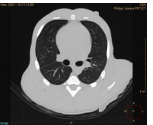

High

MF9

MF10

MF11

MF12

MF13

MF14

MF15

MF16

BL

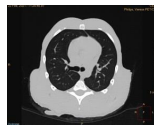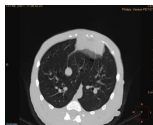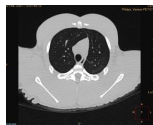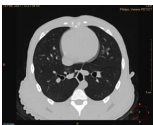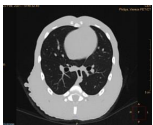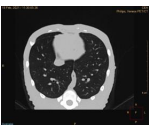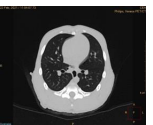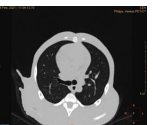

d3

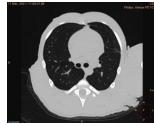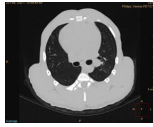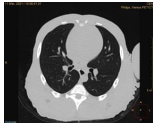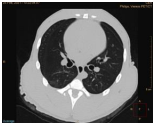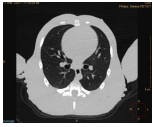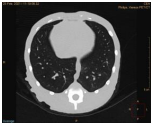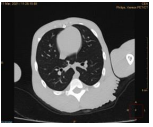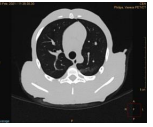

d10

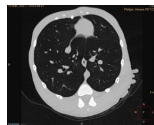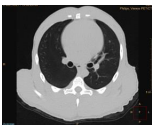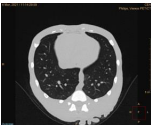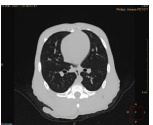

Medium

MF17

MF18

MF19

MF20

MF21

MF22

MF23

MF24

BL

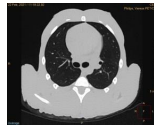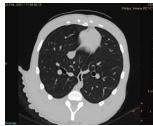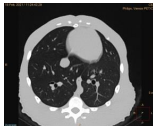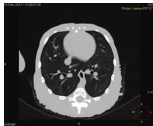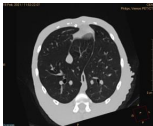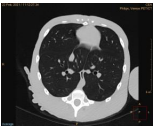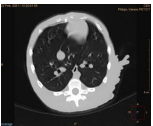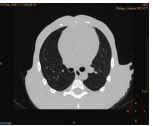

d3

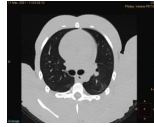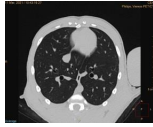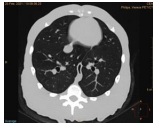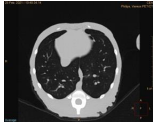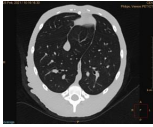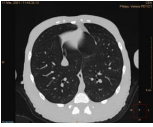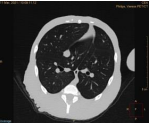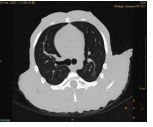

d10

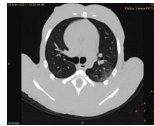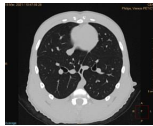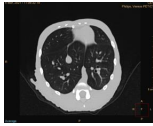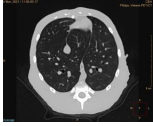

Supplement: 43856_2024_488_MOESM2_ESM.pdf [file 43856_2024_488_MOESM2_ESM.pdf]
