# Supplementary material for: Immunogenicity and efficacy of VLA2001 vaccine against SARS-CoV-2 infection in male cynomolgus macaques
Source: PubMed Central journal article supplement (PMC10991505; doi:10.1038/s43856-024-00488-w), 2024-04-03
Supplement: 43856_2024_488_MOESM3_ESM.pdf [file 43856_2024_488_MOESM3_ESM.pdf]

1 **Description of Additional Supplementary Files**

2

3 **File Name:** Supplementary Data 1

4 **Description:** Raw data are included with a summary and one sheet per type of raw data. Each sheet  
5 is labelled by the figure number and panel.
